# Supplementary material for: Graphene oxide based surface-enhanced Raman scattering probes for cancer cell imaging
Source: Royal Society of Chemistry journal article supplement (doi:10.1039/c2cp43715e), 2013-01-01
Supplement: c2cp43715e.pdf [file c2cp43715e.pdf]

## Supporting Information

# Graphene oxide based surface-enhanced Raman scattering probes for cancer cell imaging

Zhiming Liu, Zhouyi Guo,\* Huiqing Zhong, Xiaochu Qin, Mingming Wan and Biwen

Yang

*MOE Key Laboratory of Laser Life Science & SATCM Third Grade Laboratory of Chinese*

*Medicine and Photonics technology, College of Biophotonics, South China Normal University,*

*Guangzhou 510631, China.*

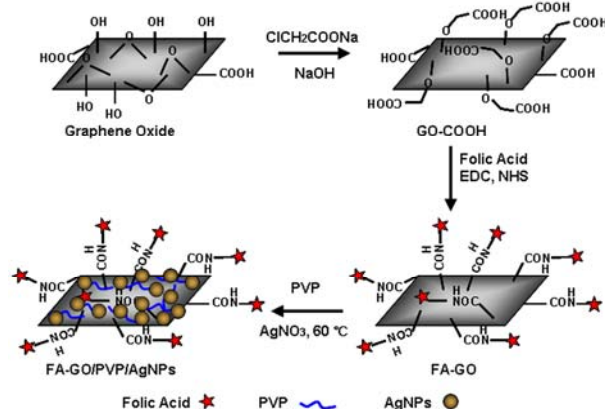

Scheme S1 Illustration of the fabrication of FA-GO/AgNPs.

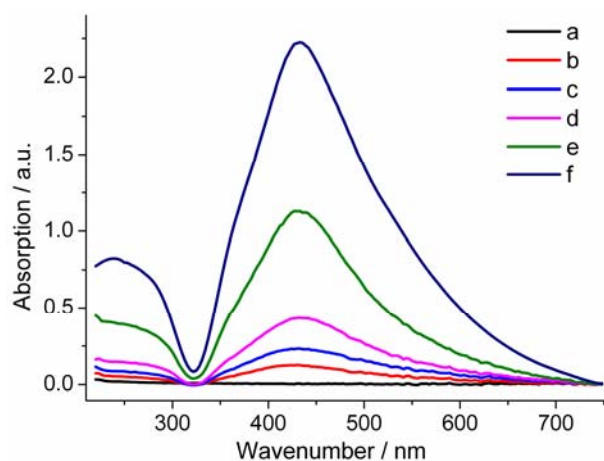

Fig. S1 UV-Vis absorption spectra of GO/AgNPs with identical graphitic carbon (5 µg/mL) prepared with a various weight ratio between the AgNO<sub>3</sub> and GO: 0 (a), 48 (b), 96 (c), 192 (d), 384 (e), 768 (f).

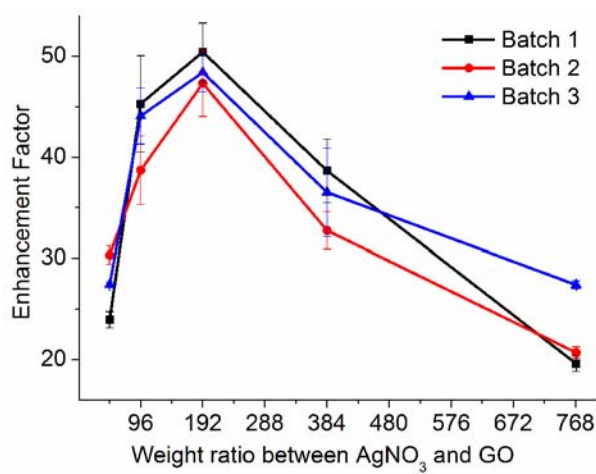

Fig. S2 Batch-to-batch reproducibility of the as-prepared GO/AgNPs samples. The uniform trends of EFs in response to the AgNO<sub>3</sub>/GO ratio indicate a good reproducibility of the synthesis process. Errors bars are based on standard deviations (SD) of three parallel measurements of each sample.

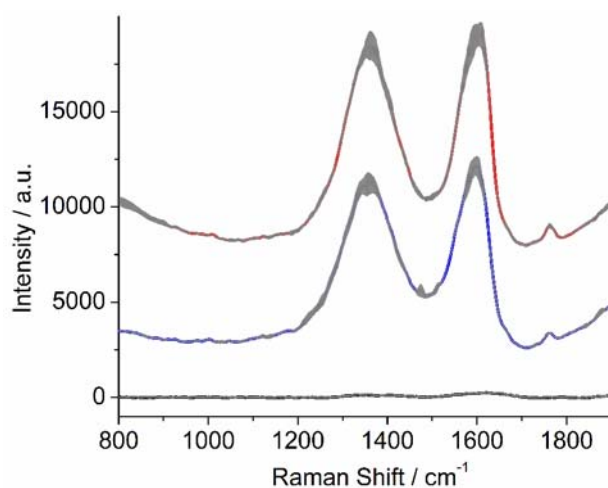

Fig. S3 The stability of the GO/AgNP hybrids. Black line represents the Raman spectrum of GO (25  $\mu\text{g/mL}$ ). Red line represents the SERS spectrum of as-prepared GO/AgNPs (192) with 25  $\mu\text{g/mL}$  graphitic carbon. Blue line represents the SERS spectrum of GO/AgNPs (192) with 25  $\mu\text{g/mL}$  graphitic carbon stored for two months. The SERS EF of GO/AgNPs (192) is measured as  $\sim 43.3$  after two months storage, which is similar to the value of as-prepared hybrids ( $\sim 48.4$ ). The grey regions show the SD of three parallel measurements of each sample.

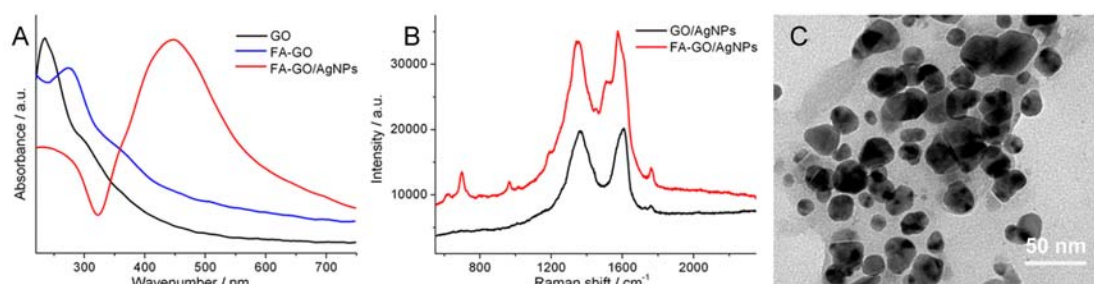

Fig. S4 Characterization of FA-GO/AgNPs. (A) UV-Vis absorption spectra. (B) SERS spectra. (C) TEM image of FA-GO/AgNPs.

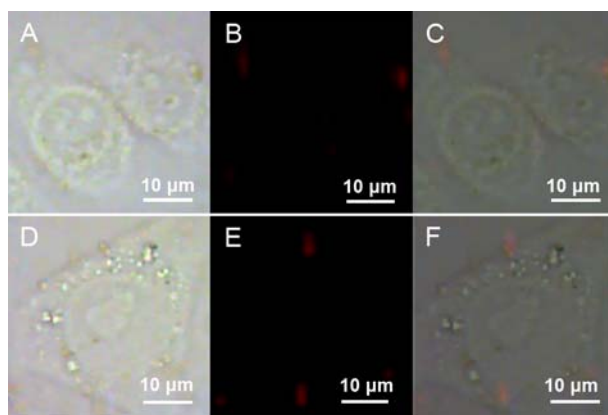

Fig. S5 Typical bright field images (A and D), SERS images (B and E) and the overlap images (C and F) of A549 cells (A-C) and HeLa cells (D-F) incubated with 1 µg/mL GO/AgNPs for 2h.
